# Supplementary material for: Bacteriological Evaluation of Gingival Crevicular Fluid in Teeth Restored Using Fixed Dental Prostheses: An In Vivo Study
Source: MDPI journal article supplement (doi:10.3390/ijms22115463), 2021-05-22
Supplement: s1 [file s1]

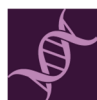

**Table S1.** Demographic characteristics and periodontal (PDL) health status of the study participants.

|                     |         | Control (n=24)                                              | CC_MC<br>(n=35)                                                              | CC-Zr<br>(n=35) | MC<br>(n=35) | P-value  |
|---------------------|---------|-------------------------------------------------------------|------------------------------------------------------------------------------|-----------------|--------------|----------|
| Gender<br><br>n (%) | Male    | 11 (45.8%)                                                  | 17 (48.6%)                                                                   | 16 (45,75)      | 17 (48.6%)   | P = 0.11 |
|                     | Female  | 13 (54.2%)                                                  | 18 (51.4%)                                                                   | 19 (54.3%)      | 18 (51.4%)   | P = 0.14 |
| Age (years)         | Range   | 19-47                                                       | 18-48                                                                        | 19-49           | 20-50        | P>0,5    |
|                     | Mean±SD | 34.8±7.8                                                    | 32.3±8.5                                                                     | 35.1±6.8        | 36.6±8.2     |          |
| PDL status          |         | Healthy periodontium,<br>no bleeding/periodontal<br>pockets | Clinical examination confirmed the diagnosis of<br>periodontitis in patients |                 |              |          |

**Table S2.** Multiple comparison of the microbiological composition and counts of the gingival crevicular fluid in all groups before and after treatment.

| Microorganisms                        | Before treatment         |                     |                     |                |                |                   |
|---------------------------------------|--------------------------|---------------------|---------------------|----------------|----------------|-------------------|
|                                       | Healthy vs<br>MC         | Healthy vs<br>CC-MC | Healthy vs<br>CC-Zr | MC vs<br>CC-MC | MC vs<br>CC-Zr | CC-MC vs<br>CC-Zr |
| <i>Enterococcus spp.</i>              | 0.741                    | 0.976               | 0.381               | 0.940          | 0.883          | 0.624             |
| <i>Peptostreptococcus spp.</i>        | 0.980                    | 0.927               | 0.976               | 0.993          | 0.844          | 0.738             |
| <i>Neisseria spp.</i>                 | 0.979                    | 0.041               | 0.966               | 0.065          | 0.999          | 0.149             |
| <i>Peptococcus spp.</i>               | 1                        | 0.683               | 1                   | 0.553          | 0.998          | 0.735             |
| <i>Staphylococcus spp.</i>            | 1                        | 0.932               | 0.004               | 0.923          | 0.002          | 0.023             |
| <i>Beta-hemolytic streptococcus</i>   | 0.362                    | 0.198               | 1                   | 0.960          | 0.394          | 0.221             |
| <i>Candida albicans</i>               | 0.600                    | 0.977               | 1                   | 0.846          | 0.650          | 0.985             |
| <i>Alpha-haemolytic streptococcus</i> | 0.996                    | 0.058               | 0.808               | 0.060          | 0.878          | 0.400             |
| <i>Lactobacillus spp.</i>             | 0.995                    | 0.998               | 0.877               | 0.970          | 0.721          | 0.939             |
| <i>Corynebacterium spp.</i>           | 0.830                    | 0.015               | 1                   | 0.078          | 0.803          | 0.015             |
| <i>Fusobacterium spp.</i>             | 0.636                    | 0.901               | 1                   | 0.636          | 0.970          | 0.907             |
| <i>Porphyromonas gingivalis</i>       | 1                        | 1                   | 0.208               | 1              | 0.167          | 0.207             |
| <i>Prevotella intermedia</i>          | 1                        | 1                   | 0.285               | 1              | 0.229          | 0.280             |
| Microorganisms                        | At 6 months of treatment |                     |                     |                |                |                   |
|                                       | Healthy vs<br>MC         | Healthy vs<br>CC-MC | Healthy vs<br>CC-Zr | MC vs<br>CC-MC | MC vs<br>CC-Zr | CC-MC vs<br>CC-Zr |
| <i>Enterococcus spp.</i>              | 0.065                    | 0.982               | 0.992               | 0.153          | 0.154          | 1                 |
| <i>Peptostreptococcus spp.</i>        | 0.653                    | 0.871               | 0.930               | 0.189          | 0.283          | 0.999             |
| <i>Neisseria spp.</i>                 | 0.735                    | 0.494               | 0.631               | 0.961          | 0.992          | 0.998             |
| <i>Peptococcus spp.</i>               | 0.949                    | 0.525               | 1                   | 0.181          | 0.958          | 0.532             |
| <i>Staphylococcus spp.</i>            | 0.266                    | 0.995               | 0.657               | 0.152          | 0.952          | 0.497             |
| <i>Beta-hemolytic streptococcus</i>   | 0.025                    | 1                   | 1                   | 0.024          | 0.31           | 1                 |
| <i>Candida albicans</i>               | 0.408                    | 1                   | 1                   | 0.397          | 0.431          | 1                 |
| <i>Alpha-haemolytic streptococcus</i> | 0.968                    | 0.427               | 1                   | 0.637          | 0.983          | 0.492             |
| <i>Lactobacillus spp.</i>             | 0.833                    | 0.973               | 0.724               | 0.980          | 0.990          | 0.921             |
| <i>Corynebacterium spp.</i>           | 0.729                    | 0.980               | 0.923               | 0.923          | 0.333          | 0.743             |
| <i>Fusobacterium spp.</i>             | 0.936                    | 0.650               | 0.589               | 0.248          | 0.217          | 0.999             |
| <i>Porphyromonas gingivalis</i>       | 0.645                    | 1                   | 0.966               | 0.692          | 0.921          | 0.979             |
| <i>Prevotella intermedia</i>          | 0.657                    | 0.994               | 0.271               | 0.812          | 0.842          | 0.395             |
| <i>Veillonella spp.</i>               | 0.759                    | 0.997               | 0.271               | 0.864          | 0.755          | 0.362             |
| <i>Corynebacterium anaerobium</i>     | 0.740                    | 0.571               | 0.999               | 0.983          | 0.825          | 0.667             |

| At 12 months of treatment             |       |       |       |       |       |       |
|---------------------------------------|-------|-------|-------|-------|-------|-------|
| <i>Enterococcus spp.</i>              | 0.064 | 0.997 | 0.668 | 0.099 | 0.631 | 0.774 |
| <i>Peptostreptococcus spp.</i>        | 0.318 | 0.207 | 0.491 | 0.207 | 0.972 | 0.972 |
| <i>Neisseria spp.</i>                 | 0.927 | 0.968 | 0.113 | 0.999 | 0.265 | 0.265 |
| <i>Peptococcus spp.</i>               | 0.224 | 0.118 | 0.913 | 0.964 | 0.051 | 0.025 |
| <i>Staphylococcus spp.</i>            | 0.150 | 1     | 0.957 | 0.149 | 0.430 | 0.961 |
| <i>Beta-hemolytic streptococcus</i>   | 0.001 | 0.994 | 1     | 0.002 | 0.002 | 0.998 |
| <i>Candida albicans</i>               | 0.555 | 1     | 1     | 0.535 | 0.565 | 1     |
| <i>Alpha-haemolytic streptococcus</i> | 0.411 | 0.961 | 0.346 | 0.731 | 0.992 | 0.630 |
| <i>Lactobacillus spp.</i>             | 0.213 | 0.211 | 0.232 | 0.999 | 0.999 | 1     |
| <i>Corynebacterium spp.</i>           | 0.463 | 0.431 | 0.457 | 0.998 | 0.998 | 1     |
| <i>Fusobacterium spp.</i>             | 0.556 | 0.871 | 0.850 | 0.37  | 0.138 | 1     |
| <i>Porphyromonas gingivalis</i>       | 0.916 | 0.975 | 0.593 | 0.997 | 0.890 | 0.830 |
| <i>Prevotella intermedia</i>          | 0.159 | 0.186 | 0.946 | 1     | 0.479 | 0.497 |
| <i>Veillonella spp.</i>               | 0.180 | 0.933 | 0.198 | 0.501 | 0.999 | 0.493 |
| <i>Corynebacterium anaerobium</i>     | 0.915 | 0.155 | 1     | 0.370 | 0.923 | 0.173 |

Post hoc Scheffe. Significant at  $P < 0.05$ .
